# Supplementary material for: Hypoglycemic mechanisms ofGanoderma lucidumpolysaccharides F31 in db/db miceviaRNA-seq and iTRAQ
Source: Royal Society of Chemistry journal article supplement (doi:10.1039/c8fo01656a), 2018-01-01
Supplement: c8fo01656a1.xlsx [file c8fo01656a1.xlsx]

## Sheet: Sheet1
Table S1 Statistics of each sample RNA-seq data
Sample Name	Clean reads	Genome map Rate	Gene map Rate	Expressed Gene
F31-1	12,661,212	0.8468	0.8198	14729
F31-2	12,687,426	0.8409	0.84	14709
DC1	12,6526,15	0.8289	0.8448	14776
DC2	12,362,461	0.8599	0.803	14935
NC1	12,442,589	0.8268	0.8587	14381
NC2	12,679,953	0.8404	0.8233	14466
average	12,581,042	0.840617	0.8316	14666
