# Supplementary material for: Hypoglycemic mechanisms ofGanoderma lucidumpolysaccharides F31 in db/db miceviaRNA-seq and iTRAQ
Source: Royal Society of Chemistry journal article supplement (doi:10.1039/c8fo01656a), 2018-01-01
Supplement: c8fo01656a2.xlsx [file c8fo01656a2.xlsx]

## Sheet: Sheet1
Table S2 The result of correlation value bewteen each two samples
Sample	F31-2	F31-1	DC2	DC1	NC2	NC1
F31-2	1	0.987339	0.977028	0.951733	0.800378	0.663284
F31-1	0.987339	1	0.977648	0.948048	0.843221	0.710945
DC2	0.977028	0.977648	1	0.927476	0.759528	0.602887
DC1	0.951733	0.948048	0.927476	1	0.800762	0.661587
NC2	0.800378	0.843221	0.759528	0.800762	1	0.95715
NC1	0.663284	0.710945	0.602887	0.661587	0.95715	1
