# Supplementary material for: Hypoglycemic mechanisms ofGanoderma lucidumpolysaccharides F31 in db/db miceviaRNA-seq and iTRAQ
Source: Royal Society of Chemistry journal article supplement (doi:10.1039/c8fo01656a), 2018-01-01
Supplement: c8fo01656a3.pdf [file c8fo01656a3.pdf]

S3

**Table CV distribution in two comparisons**

| <b>Comparisons</b>            | <b>Mean CV</b> | <b>10% CV</b> | <b>20% CV</b> | <b>30% CV</b> | <b>40% CV</b> | <b>50% CV</b> | <b>60% CV</b> | <b>70% CV</b> | <b>80% CV</b> | <b>90% CV</b> | <b>100% CV</b> |
|-------------------------------|----------------|---------------|---------------|---------------|---------------|---------------|---------------|---------------|---------------|---------------|----------------|
| <b>NC1-DC1-VS-NC2-DC2</b>     | <b>0.087</b>   | <b>0.731</b>  | <b>0.905</b>  | <b>0.962</b>  | <b>0.98</b>   | <b>0.988</b>  | <b>0.994</b>  | <b>0.996</b>  | <b>0.998</b>  | <b>0.999</b>  | <b>1</b>       |
| <b>F31-1-MX1-VS-F31-2-DC2</b> | <b>0.1</b>     | <b>0.65</b>   | <b>0.87</b>   | <b>0.95</b>   | <b>0.98</b>   | <b>0.98</b>   | <b>0.99</b>   | <b>0.99</b>   | <b>1</b>      | <b>1</b>      | <b>1</b>       |
| <b>F31-1-NC1-VS-F31-2-NC2</b> | <b>0.083</b>   | <b>0.721</b>  | <b>0.914</b>  | <b>0.968</b>  | <b>0.985</b>  | <b>0.991</b>  | <b>0.995</b>  | <b>0.998</b>  | <b>0.999</b>  | <b>1</b>      | <b>1</b>       |
