# Supplementary material for: Hypoglycemic mechanisms ofGanoderma lucidumpolysaccharides F31 in db/db miceviaRNA-seq and iTRAQ
Source: Royal Society of Chemistry journal article supplement (doi:10.1039/c8fo01656a), 2018-01-01
Supplement: c8fo01656a5.xlsx [file c8fo01656a5.xlsx]

## Sheet: F3-TS6-7
Table S5-1 KEGG pathway enrichment anlaysis of different expression genes in two comparions
		（-LOG10(Qvalue)）
Pathway ID	Pathway name	NC-VS-DC	F31-VS-DC
ko00071	Fatty acid metabolism	4.0646	0
ko00140	Steroid hormone biosynthesis	12.8345	0
ko00480	Glutathione metabolism	5.88745	0
ko00590	Arachidonic acid metabolism	27.6222	18.2724
ko00591	Linoleic acid metabolism	5.11624	0
ko00830	Retinol metabolism	16.9365	4.41609
ko00920	Sulfur metabolism	12.6192	0
ko00980	Metabolism of xenobiotics by cytochrome P450	32.6073	0
ko00982	Drug metabolism - cytochrome P450	27.6222	0
ko00983	Drug metabolism - other enzymes	4.0646	0
ko01100	Metabolic pathways	19.8614	7.28837
ko04145	Phagosome	5.76597	3.78081
ko04514	Cell adhesion molecules (CAMs)	4.34495	3.35193
ko04610	Complement and coagulation cascades	4.64654	0
ko04612	Antigen processing and presentation	6.64675	5.16257
ko04940	Type I diabetes mellitus	8.28365	4.71757
ko04976	Bile secretion	6.03284	0
ko05168	Herpes simplex infection	0	3.80247
ko05320	Autoimmune thyroid disease	6.97523	4.41609
ko05330	Allograft rejection	8.86311	4.83109
ko05332	Graft-versus-host disease	9.03966	4.83109
ko05416	Viral myocarditis	0	3.071
Table S5-2 KEGG pathway enrichment anlaysis of different expression proteins in two comparions
		（-LOG10(Qvalue)）
Pathway ID	Pathway name	NC-VS-DC	F31-VS-DC
ko00040	Pentose and glucuronate interconversions	3.14303	0
ko00140	Steroid hormone biosynthesis	8.23718	0
ko00500	Starch and sucrose metabolism	3.42366	0
ko00590	Arachidonic acid metabolism	7.18264	0
ko00591	Linoleic acid metabolism	4.45285	0
ko00830	Retinol metabolism	11.2617	0
ko00900	Terpenoid backbone biosynthesis	4.02564	0
ko00980	Metabolism of xenobiotics by cytochrome P450	14.3243	0
ko00982	Drug metabolism - cytochrome P450	13.6591	0
ko00983	Drug metabolism - other enzymes	6.09223	0
ko01100	Metabolic pathways	5.86357	0
ko03010	Ribosome	4.09615	0
ko03320	PPAR signaling pathway	5.65439	3.65
ko04141	Protein processing in endoplasmic reticulum	4.17459	0
ko04612	Antigen processing and presentation	3.03718	0
ko04974	Protein digestion and absorption	0	3.19931
ko04976	Bile secretion	4.05977	0
ko05020	Prion diseases	3.14303	0
ko05332	Graft-versus-host disease	3.02103	0
Intergrative analysis of gene and protein expression, there was no any one common pathway in the comparision of F31-VS-DC, however, there were 11 common pathways enriched in comparision of NC-VS-DC(11 common pathway were marked red)
