# Supplementary material for: Hypoglycemic mechanisms ofGanoderma lucidumpolysaccharides F31 in db/db miceviaRNA-seq and iTRAQ
Source: Royal Society of Chemistry journal article supplement (doi:10.1039/c8fo01656a), 2018-01-01
Supplement: c8fo01656a6.xlsx [file c8fo01656a6.xlsx]

## Sheet: KEGG
The target genes of Mir324, Snord37 and Snord14e
snord_14	Pathway	DEGs genes with pathway annotation (575)	All genes with pathway annotation (16857)	Pvalue	Qvalue	Pathway ID	Level 1	Level 2
1	Olfactory transduction	71 (12.35%)	1199 (7.11%)	3.41228e-06	0.000921315	ko04740	Organismal Systems	Sensory system
2	Carbon metabolism	14 (2.43%)	151 (0.9%)	0.000668338	0.0734006	ko01200	Metabolism	Global and overview maps
3	Fatty acid degradation	9 (1.57%)	73 (0.43%)	0.000815562	0.0734006	ko00071	Metabolism	Lipid metabolism
4	Propanoate metabolism	6 (1.04%)	43 (0.26%)	0.00319717	0.184648	ko00640	Metabolism	Carbohydrate metabolism
5	Ascorbate and aldarate metabolism	5 (0.87%)	33 (0.2%)	0.00488342	0.184648	ko00053	Metabolism	Carbohydrate metabolism
6	Gastric acid secretion	11 (1.91%)	131 (0.78%)	0.0052372	0.184648	ko04971	Organismal Systems	Digestive system
7	Progesterone-mediated oocyte maturation	11 (1.91%)	131 (0.78%)	0.0052372	0.184648	ko04914	Organismal Systems	Endocrine system
8	Central carbon metabolism in cancer	9 (1.57%)	96 (0.57%)	0.00547106	0.184648	ko05230	Human Diseases	Cancers: Overview
9	Bile secretion	10 (1.74%)	118 (0.7%)	0.00712356	0.213707	ko04976	Organismal Systems	Digestive system
10	Butirosin and neomycin biosynthesis	2 (0.35%)	5 (0.03%)	0.0108458	0.292838	ko00524	Metabolism	Biosynthesis of other secondary metabolites
11	Porphyrin and chlorophyll metabolism	5 (0.87%)	43 (0.26%)	0.0150023	0.330331	ko00860	Metabolism	Metabolism of cofactors and vitamins
12	Serotonergic synapse	12 (2.09%)	172 (1.02%)	0.0150247	0.330331	ko04726	Organismal Systems	Nervous system
13	Fatty acid metabolism	7 (1.22%)	77 (0.46%)	0.0159048	0.330331	ko01212	Metabolism	Global and overview maps
14	Glycosylphosphatidylinositol(GPI)-anchor biosynthesis	4 (0.7%)	30 (0.18%)	0.0181681	0.350385	ko00563	Metabolism	Glycan biosynthesis and metabolism
15	Pyruvate metabolism	6 (1.04%)	63 (0.37%)	0.0201685	0.363033	ko00620	Metabolism	Carbohydrate metabolism
16	Fat digestion and absorption	6 (1.04%)	67 (0.4%)	0.026465	0.446596	ko04975	Organismal Systems	Digestive system
17	Starch and sucrose metabolism	6 (1.04%)	69 (0.41%)	0.0300527	0.455986	ko00500	Metabolism	Carbohydrate metabolism
18	alpha-Linolenic acid metabolism	4 (0.7%)	35 (0.21%)	0.0303991	0.455986	ko00592	Metabolism	Lipid metabolism
19	Glycolysis / Gluconeogenesis	7 (1.22%)	92 (0.55%)	0.0376922	0.497462	ko00010	Metabolism	Carbohydrate metabolism
20	Biosynthesis of unsaturated fatty acids	4 (0.7%)	38 (0.23%)	0.0395937	0.497462	ko01040	Metabolism	Lipid metabolism
snord_37
1	Lysine biosynthesis	1 (0.73%)	2 (0.01%)	0.0161888	0.847755	ko00300	Metabolism	Amino acid metabolism
2	Glycosylphosphatidylinositol(GPI)-anchor biosynthesis	2 (1.46%)	30 (0.18%)	0.0245848	0.847755	ko00563	Metabolism	Glycan biosynthesis and metabolism
3	Purine metabolism	5 (3.65%)	218 (1.29%)	0.0327632	0.847755	ko00230	Metabolism	Nucleotide metabolism
4	NF-kappa B signaling pathway	4 (2.92%)	153 (0.91%)	0.0362654	0.847755	ko04064	Environmental Information Processing	Signal transduction
5	Jak-STAT signaling pathway	5 (3.65%)	239 (1.42%)	0.0456505	0.847755	ko04630	Environmental Information Processing	Signal transduction
6	RIG-I-like receptor signaling pathway	3 (2.19%)	99 (0.59%)	0.0468682	0.847755	ko04622	Organismal Systems	Immune system
7	Autoimmune thyroid disease	3 (2.19%)	110 (0.65%)	0.060538	0.847755	ko05320	Human Diseases	Immune diseases
8	Regulation of autophagy	2 (1.46%)	57 (0.34%)	0.0783596	0.847755	ko04140	Cellular Processes	Transport and catabolism
9	D-Arginine and D-ornithine metabolism	1 (0.73%)	12 (0.07%)	0.0933119	0.847755	ko00472	Metabolism	Metabolism of other amino acids
10	Viral myocarditis	3 (2.19%)	141 (0.84%)	0.107517	0.847755	ko05416	Human Diseases	Cardiovascular diseases
11	Antigen processing and presentation	3 (2.19%)	142 (0.84%)	0.109218	0.847755	ko04612	Organismal Systems	Immune system
12	Allograft rejection	2 (1.46%)	77 (0.46%)	0.129656	0.847755	ko05330	Human Diseases	Immune diseases
13	Leukocyte transendothelial migration	4 (2.92%)	244 (1.45%)	0.137739	0.847755	ko04670	Organismal Systems	Immune system
14	Phagosome	5 (3.65%)	344 (2.04%)	0.14894	0.847755	ko04145	Cellular Processes	Transport and catabolism
15	Pantothenate and CoA biosynthesis	1 (0.73%)	20 (0.12%)	0.150664	0.847755	ko00770	Metabolism	Metabolism of cofactors and vitamins
16	Type I diabetes mellitus	2 (1.46%)	86 (0.51%)	0.154729	0.847755	ko04940	Human Diseases	Endocrine and metabolic diseases
17	Natural killer cell mediated cytotoxicity	4 (2.92%)	256 (1.52%)	0.155653	0.847755	ko04650	Organismal Systems	Immune system
18	One carbon pool by folate	1 (0.73%)	22 (0.13%)	0.16443	0.847755	ko00670	Metabolism	Metabolism of cofactors and vitamins
19	Graft-versus-host disease	2 (1.46%)	94 (0.56%)	0.177723	0.847755	ko05332	Human Diseases	Immune diseases
20	2-Oxocarboxylic acid metabolism	1 (0.73%)	24 (0.14%)	0.177974	0.847755	ko01210	Metabolism	Global and overview maps
mir_324
1	Focal adhesion	13 (6.7%)	415 (2.46%)	0.00106315	0.20944	ko04510	Cellular Processes	Cellular community
2	Central carbon metabolism in cancer	5 (2.58%)	96 (0.57%)	0.00503364	0.367989	ko05230	Human Diseases	Cancers: Overview
3	Pentose phosphate pathway	3 (1.55%)	38 (0.23%)	0.0094184	0.367989	ko00030	Metabolism	Carbohydrate metabolism
4	Type II diabetes mellitus	4 (2.06%)	86 (0.51%)	0.0173688	0.367989	ko04930	Human Diseases	Endocrine and metabolic diseases
5	Complement and coagulation cascades	6 (3.09%)	180 (1.07%)	0.0179999	0.367989	ko04610	Organismal Systems	Immune system
6	cAMP signaling pathway	8 (4.12%)	288 (1.71%)	0.0185859	0.367989	ko04024	Environmental Information Processing	Signal transduction
7	Small cell lung cancer	5 (2.58%)	137 (0.81%)	0.0211619	0.367989	ko05222	Human Diseases	Cancers: Specific types
8	Leukocyte transendothelial migration	7 (3.61%)	244 (1.45%)	0.0230548	0.367989	ko04670	Organismal Systems	Immune system
9	Acute myeloid leukemia	4 (2.06%)	95 (0.56%)	0.0240616	0.367989	ko05221	Human Diseases	Cancers: Specific types
10	Shigellosis	5 (2.58%)	144 (0.85%)	0.0255741	0.367989	ko05131	Human Diseases	Infectious diseases: Bacterial
11	ECM-receptor interaction	6 (3.09%)	200 (1.19%)	0.0283785	0.367989	ko04512	Environmental Information Processing	Signaling molecules and interaction
12	PI3K-Akt signaling pathway	12 (6.19%)	563 (3.34%)	0.0299346	0.367989	ko04151	Environmental Information Processing	Signal transduction
13	Pathways in cancer	13 (6.7%)	633 (3.76%)	0.0316274	0.367989	ko05200	Human Diseases	Cancers: Overview
14	mTOR signaling pathway	4 (2.06%)	104 (0.62%)	0.0321244	0.367989	ko04150	Environmental Information Processing	Signal transduction
15	Osteoclast differentiation	6 (3.09%)	207 (1.23%)	0.0327845	0.367989	ko04380	Organismal Systems	Development
16	Aldosterone-regulated sodium reabsorption	3 (1.55%)	61 (0.36%)	0.0331845	0.367989	ko04960	Organismal Systems	Excretory system
17	Glycosaminoglycan biosynthesis - chondroitin sulfate / dermatan sulfate	2 (1.03%)	25 (0.15%)	0.0332335	0.367989	ko00532	Metabolism	Glycan biosynthesis and metabolism
18	Amoebiasis	6 (3.09%)	209 (1.24%)	0.0341205	0.367989	ko05146	Human Diseases	Infectious diseases: Parasitic
19	AMPK signaling pathway	6 (3.09%)	211 (1.25%)	0.0354913	0.367989	ko04152	Environmental Information Processing	Signal transduction
20	Glycosaminoglycan biosynthesis - heparan sulfate / heparin	2 (1.03%)	28 (0.17%)	0.0409484	0.403342	ko00534	Metabolism	Glycan biosynthesis and metabolism
